# Supplementary material
Source: PubMed Central journal article supplement (PMC3031490)
Supplement: blood-2010-05-284869_1.pdf [file blood-2010-05-284869_1.pdf]

| Cell Type: | Whole BM | SC9-19 | 10T1/2 | TC71 | Endothelial | Pericytes/<br>vSMC |
|------------|----------|--------|--------|------|-------------|--------------------|
| Notch 1    | Yes      | Yes    | Yes    | Yes  | Yes         | Yes                |
| Notch 2    | Yes      |        | Yes    | No   |             |                    |
| Notch 3    | Yes      |        | Yes    | No   |             | Yes                |
| Notch 4    | Yes      |        |        | Yes  | Yes         |                    |
| DLL1       | Yes      | No     |        | Yes  | Yes         |                    |
| DLL3       |          |        |        | Yes  |             |                    |
| DLL4       | Yes      | Yes    |        | Yes  | Yes         |                    |
| Jagged 1   |          | Yes    |        | Yes  | Yes         | Yes                |
| Jagged 2   |          | No     |        | Yes  | Yes         | Yes                |

**Table S1. Notch family member expression profiles.** The presence of RNA or protein for the various Notch family members in each cell type was confirmed by reverse transcription PCR or western blot. References are given for expression profiles demonstrated in other publications. Blank squares indicate unknown expression status. Notch 1 is present in whole BM, SC9-19, 10T1/2, TC71, endothelial cells, and pericytes/vSMCs. Notch 2 is expressed by whole BM and 10T1/2 cells. Notch 3 is expressed by whole BM, 10T1/2 cells, and pericytes/vSMC. Notch 4 is expressed by whole BM, TC71, and endothelial cells. DLL1 is expressed by whole BM, TC71, and endothelial cells. DLL3 is expressed by TC71 cells. DLL4 is expressed by whole BM, SC9-19, TC71, endothelial cells, and pericytes/vSMC. Jagged 1 is expressed by SC9-19, TC71, endothelial cells, and pericytes/vSMC. Jagged 2 is expressed by TC71, endothelial cells, and pericytes/vSMC.

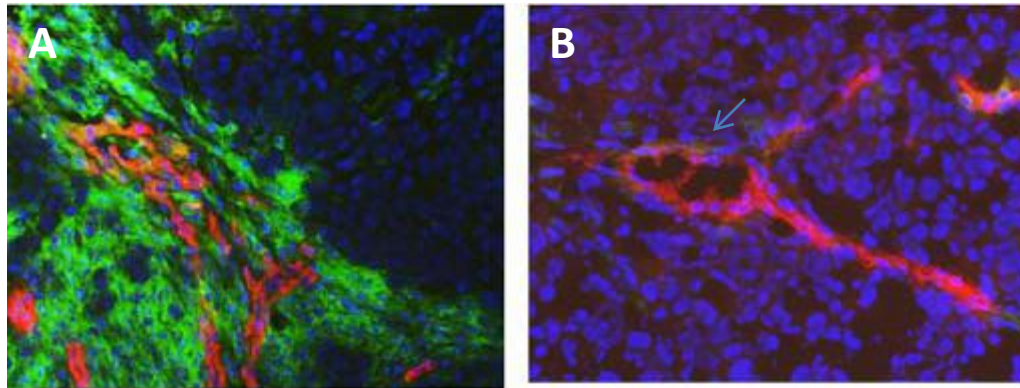

**Figure S1. DNAM inhibits BM cell participation in vasculogenesis.** Nude mice received BM transplants of either (A) MigR1-GFP control transduced cells or (B) MigR1-GFP-DNAM transduced BM cells. One month after BM transplant, TC71 cells were injected subcutaneously and allowed to form tumors. Tumors were examined by immunohistochemistry for GFP (green, BM-derived cells) and CD31 (red, endothelial cells). Nuclei are blue. In tumors from MigR1-GFP control transplanted mice, thick layers of perivascular BM-derived cells were observed. In tumors from MigR1-GFP-DNAM BM transplanted mice, very few perivascular BM-derived cells were observed (arrow indicates GFP<sup>+</sup> cell).
